# Supplementary material for: Activation of CD44/PAK1/AKT signaling promotes resistance to FGFR1 inhibition in squamous-cell lung cancer
Source: PubMed Central journal article supplement (PMC9296622; doi:10.1038/s41698-022-00296-2), 2022-07-19

# Supplementary Figure 1

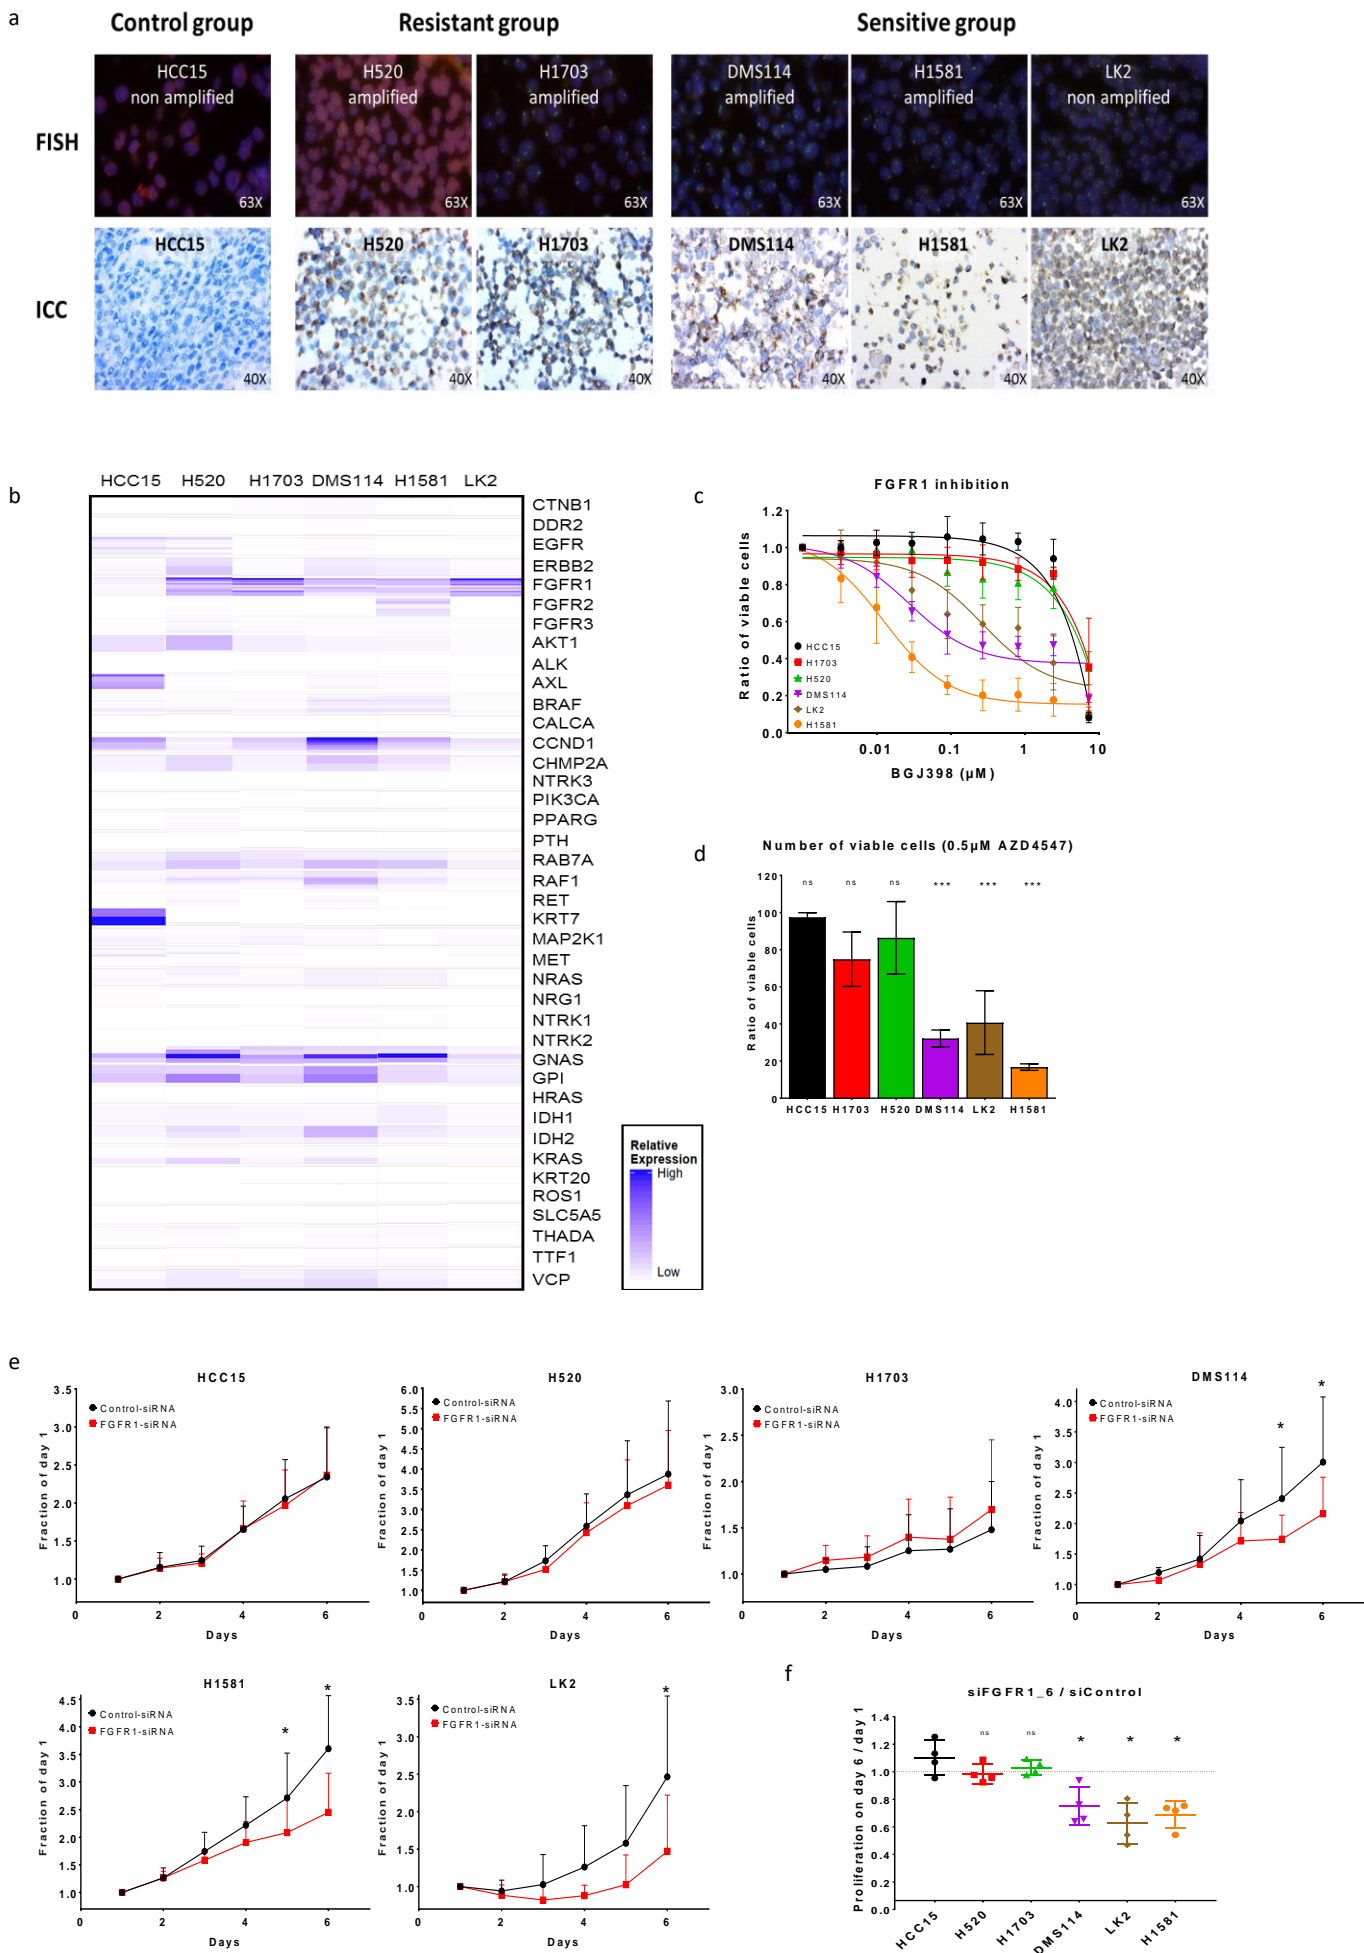

**Supplementary Figure 1:** **(A)** Fluorescence *in situ* hybridization analysis comparing numbers of green (FGFR1) and orange (CEN8) signals in nuclei of control lung cancer cell line (HCC15), resistant cell lines (NCI-H520 and NCI-H1703) and sensitive cell lines (DMS114, H1581 and LK2) to FGFR1 inhibition (top) and immunocytochemistry staining of FGFR1 expression in these cell lines (bottom). **(B)** RNA sequencing comparing control, resistant and sensitive cell lines using Archer thyroid and lung cancer directed panel. **(C)** Cell viability assay of the named six cell lines after treatment with the FGFR1 inhibitor BGJ398 measured after 96 hours. **(D)** Viable cell numbers counted after treatment of the named six cell lines with the FGFR1 inhibitor AZD4547 at concentration of 0.5  $\mu$ M for 96 hours. **(E)** Proliferation of the cell lines was measured for 6 days after treatment with siRNA targeting FGFR1 and compared with cells treated with control scrambled siRNA. **(F)** FGFR1 knockdown using a validated siRNA sequence (SI02224677). Statistical analysis was performed with the Chi-square test: ns ( $p > 0.05$ ), \* ( $p < 0.05$ ), \*\* ( $p \leq 0.01$ ) and \*\*\* ( $p \leq 0.001$ ). Mean values were plotted and error bars represent standard deviation.

# Supplementary Figure 2

a

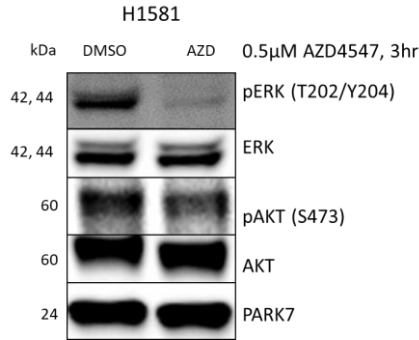

b

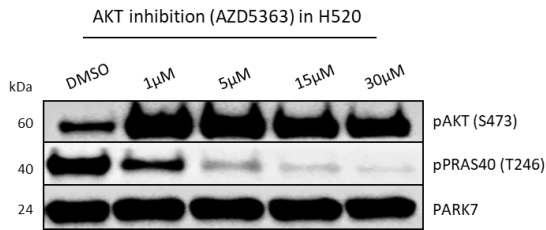

d

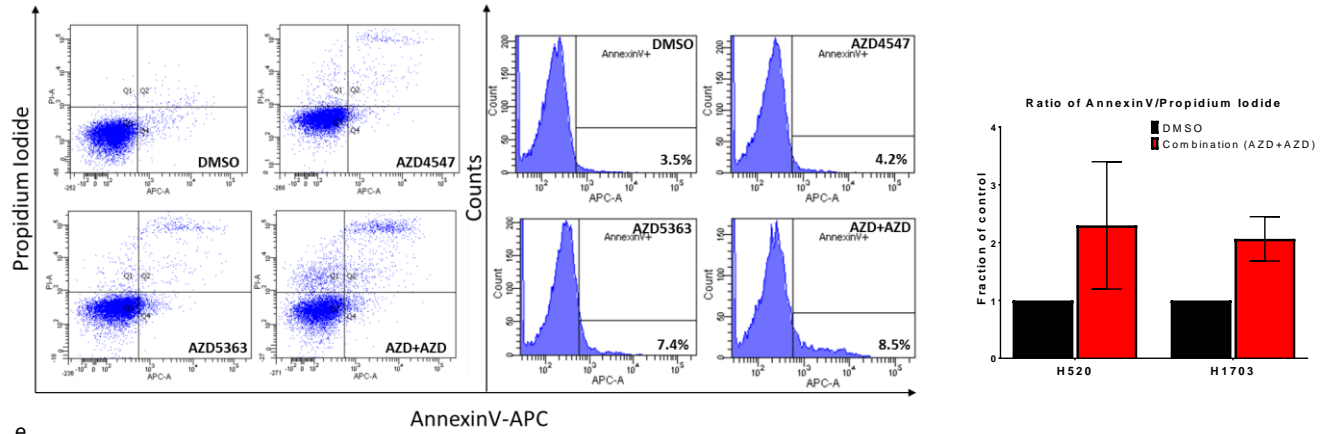

e

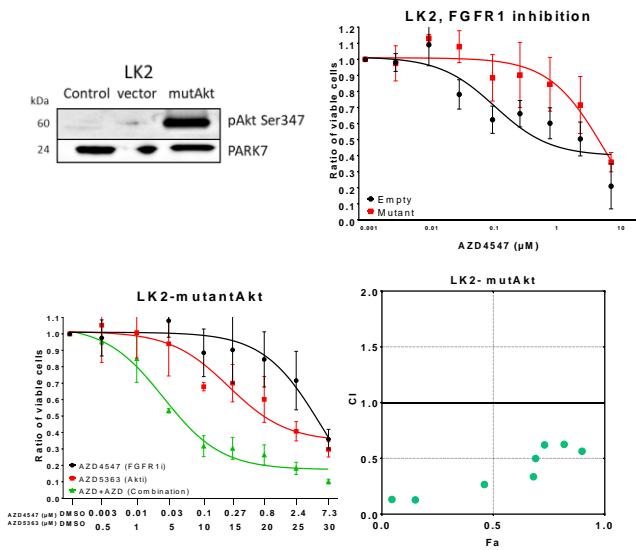

c

| Inhibitor (µM)  | 1    | 2     | 3    | 4    | 5   | 6    | 7   | 8   | 9   |
|-----------------|------|-------|------|------|-----|------|-----|-----|-----|
| FGFR1 (AZD4547) | DMSO | 0.003 | 0.01 | 0.03 | 0.1 | 0.27 | 0.8 | 2.4 | 7.3 |
| AKT (AZD5363)   | DMSO | 0.50  | 1    | 5    | 10  | 15   | 20  | 25  | 30  |

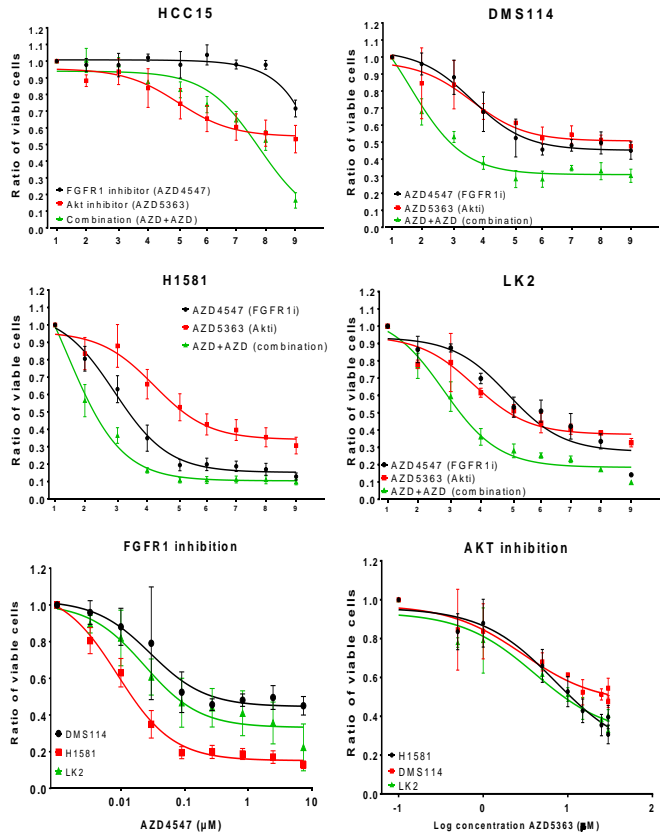

**Supplementary Figure 2:** (A) Western blot analysis showing effect of FGFR1 inhibition on AKT activation. (B) The inhibition effect of a gradient of AKT inhibitor concentrations. (C) Cell viability combination assays showing the effect of combining FGFR1 inhibition (AZD4547) with AKT inhibition (AZD5363) in control cell lines and cell lines sensitive to FGFR1 inhibition. (D) Images show the effect of combination inhibition of FGFR1 (AZD4547) and AKT (AZD5363) on inducing cellular apoptosis by measuring levels of ANNXINV using FACS analyzer. (E) Western blot and Cell viability assays showing the effect of either single or double treatment with AZD454 (FGFR1 inhibitor) and AZD5363 (AKT inhibitor) in the control LK2 cell line transfected with an empty backbone vector or a vector with constitutive active AKT gene. The nature of the interaction between the two inhibitors as indicated by a combination index plot (Chou-Talalay: (CI < 1, synergetic effect; CI = 1, additive effect; CI > 1, antagonistic effect). Statistical analysis was performed with the chi-squared test: ns ( $p > 0.05$ ), \* ( $p < 0.05$ ), \*\* ( $p \leq 0.01$ ) and \*\*\* ( $p \leq 0.001$ ). Mean values are plotted and error bars represent standard deviation.

# Supplementary Figure 3

a

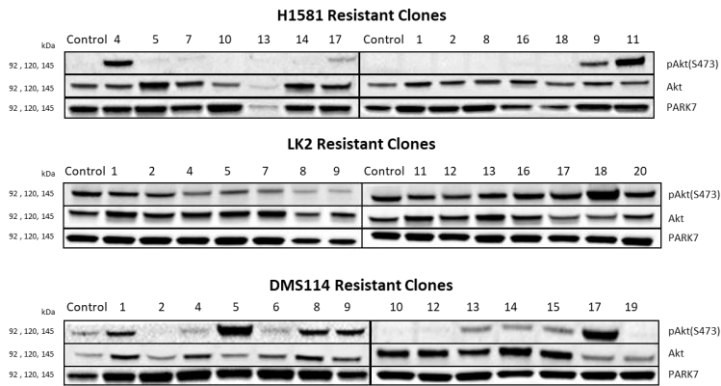

b

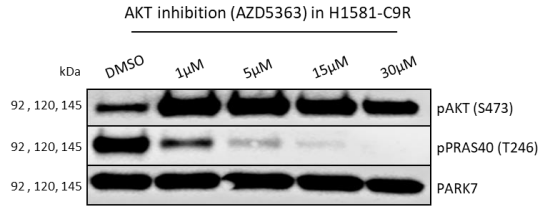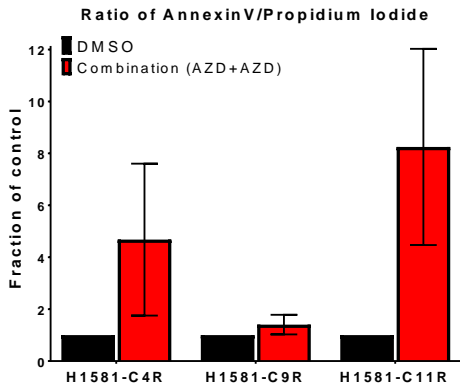

D

| Gene   | (exons)                   | Parental  | Clone 4R  | Clone 9R  | Clone 11R |
|--------|---------------------------|-----------|-----------|-----------|-----------|
| Akt1   | -3                        | Wild type | Wild type | Wild type | Wild type |
| ALK    | 22-25                     | Wild type | Wild type | Wild type | Wild type |
| BRAF   | 11 & 15                   | Wild type | Wild type | Wild type | Wild type |
| CTNNB1 | 3                         | Wild type | Wild type | Wild type | Wild type |
| EGFR   | 18-21                     | Wild type | Wild type | Wild type | Wild type |
| ERRB2  | 8, 12, 14, 17-21, 24 & 26 | Wild type | Wild type | Wild type | Wild type |
| FGFR1  | 4-7, 10 & 12-15           | Wild type | Wild type | Wild type | Wild type |
| FGFR2  | 7, 8, 10, 11 & 13-15      | Wild type | Wild type | Wild type | Wild type |
| FGFR3  | 3, 6, 9, 12, 13, 15 & 16  | Wild type | Wild type | Wild type | Wild type |
| FGFR4  | 3, 6, 9, 12, 13, 15 & 16  | Wild type | Wild type | Wild type | Wild type |
| HRAS   | 2-4                       | Wild type | Wild type | Wild type | Wild type |
| IDH1   | 4                         | Wild type | Wild type | Wild type | Wild type |
| IDH2   | 4                         | Wild type | Wild type | Wild type | Wild type |
| KRAS   | 2-4                       | Wild type | Wild type | Wild type | Wild type |
| MAP2K1 | 2                         | Wild type | Wild type | Wild type | Wild type |
| MET    | 14, 16-19 & intron 13     | Wild type | Wild type | Wild type | Wild type |
| NFE2L2 | 2                         | Wild type | Wild type | Wild type | Wild type |
| NRAS   | 2-4                       | Wild type | Wild type | Wild type | Wild type |
| PIK3CA | 10 & 21                   | Wild type | Wild type | Wild type | Wild type |
| PTEN   | 1-8                       | Wild type | Wild type | Wild type | Wild type |
| RET    | 1-20                      | Wild type | Wild type | Wild type | Wild type |
| ROS1   | 34-41                     | Wild type | Wild type | Wild type | Wild type |
| TP53   | 4-11                      | Mutant    | Mutant    | Mutant    | Mutant    |
| SMAD4  | 3 & 9-12                  | Wild type | Wild type | Wild type | Wild type |

E

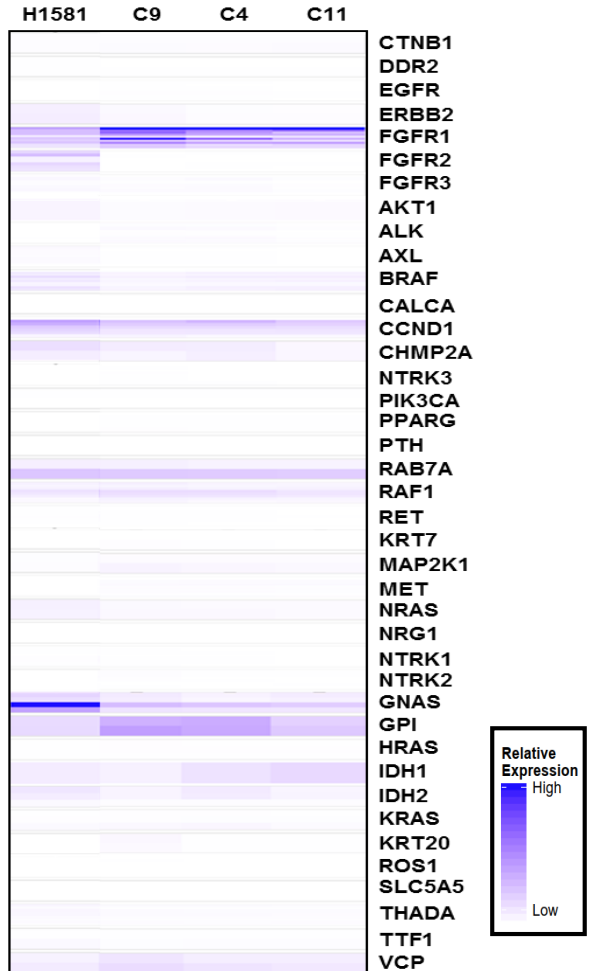

**Supplementary Figure 3:** (A) Western blot analysis showing the expression of FGFR1, phosphorylated AKT, total AKT, phosphorylated ERK and total ERK among different single clones with induced FGFR1 inhibition resistance. (B) Western blot analysis showing the effect of grading concentration of AKT inhibition in resistant cell lines. (C) Effect of double treatment (FGFR1 inhibitor, AZD4547 and AKT inhibitor; AZD5363) on cellular apoptosis in FGFR1 resistant cell lines. (D) DNA targeted sequencing panel against main gene alterations in lung cancer comparing the sensitive parental control cell line H1581 with the three single induced resistant clones H1581-C4R, H1581-C9R and H1581-C11R. (E) RNA sequencing using the Archer thyroid- and lung-cancer-directed panel comparing RNA expression among the sensitive parental control cell line and its three resistant single clones. Statistical analysis was performed with the Chi-square test: ns ( $p>0.05$ ), \* ( $p<0.05$ ), \*\* ( $p\leq 0.01$ ) and \*\*\* ( $p\leq 0.001$ ). Mean values were plotted and error bars represent standard deviation.

# Supplementary Figure 4

a

GPome quantified phosphosites (total = 14014)

pYome quantified phosphosites (total = 831)

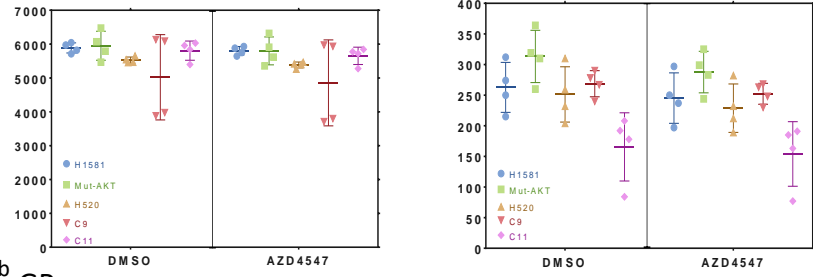

b

GPome

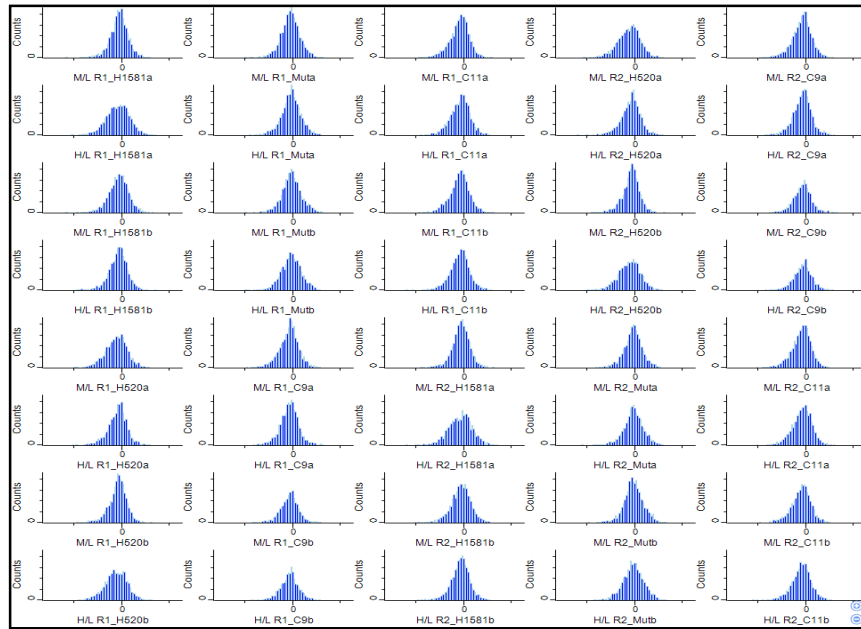

pYome

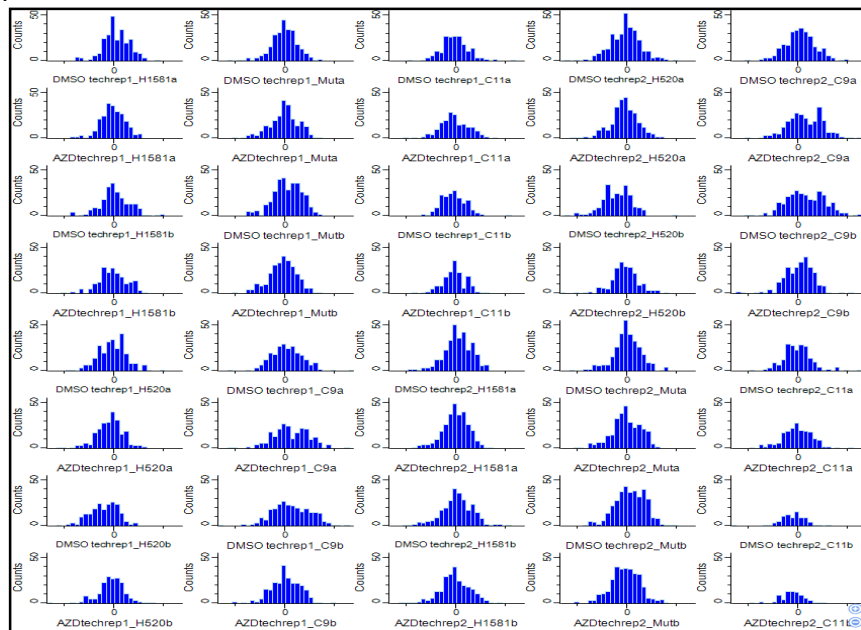

**Supplementary Figure 4:** **(A)** Numeric Venn diagram showing number of quantified phosphosites among the five cell lines used in phospho-LC-MS/MS analysis after GPome and pYome enrichment using two technical and two biological replicates for each sample. **(B)** Histograms showing normal distribution of SILAC ratios among the five cell lines used in LC-MS/MS analysis; **a** and **b** indicate biological replicates while R1 and R2 indicate technical replicates for each sample. Mean values are plotted; error bars represent standard deviation.



# Supplementary Figure 5

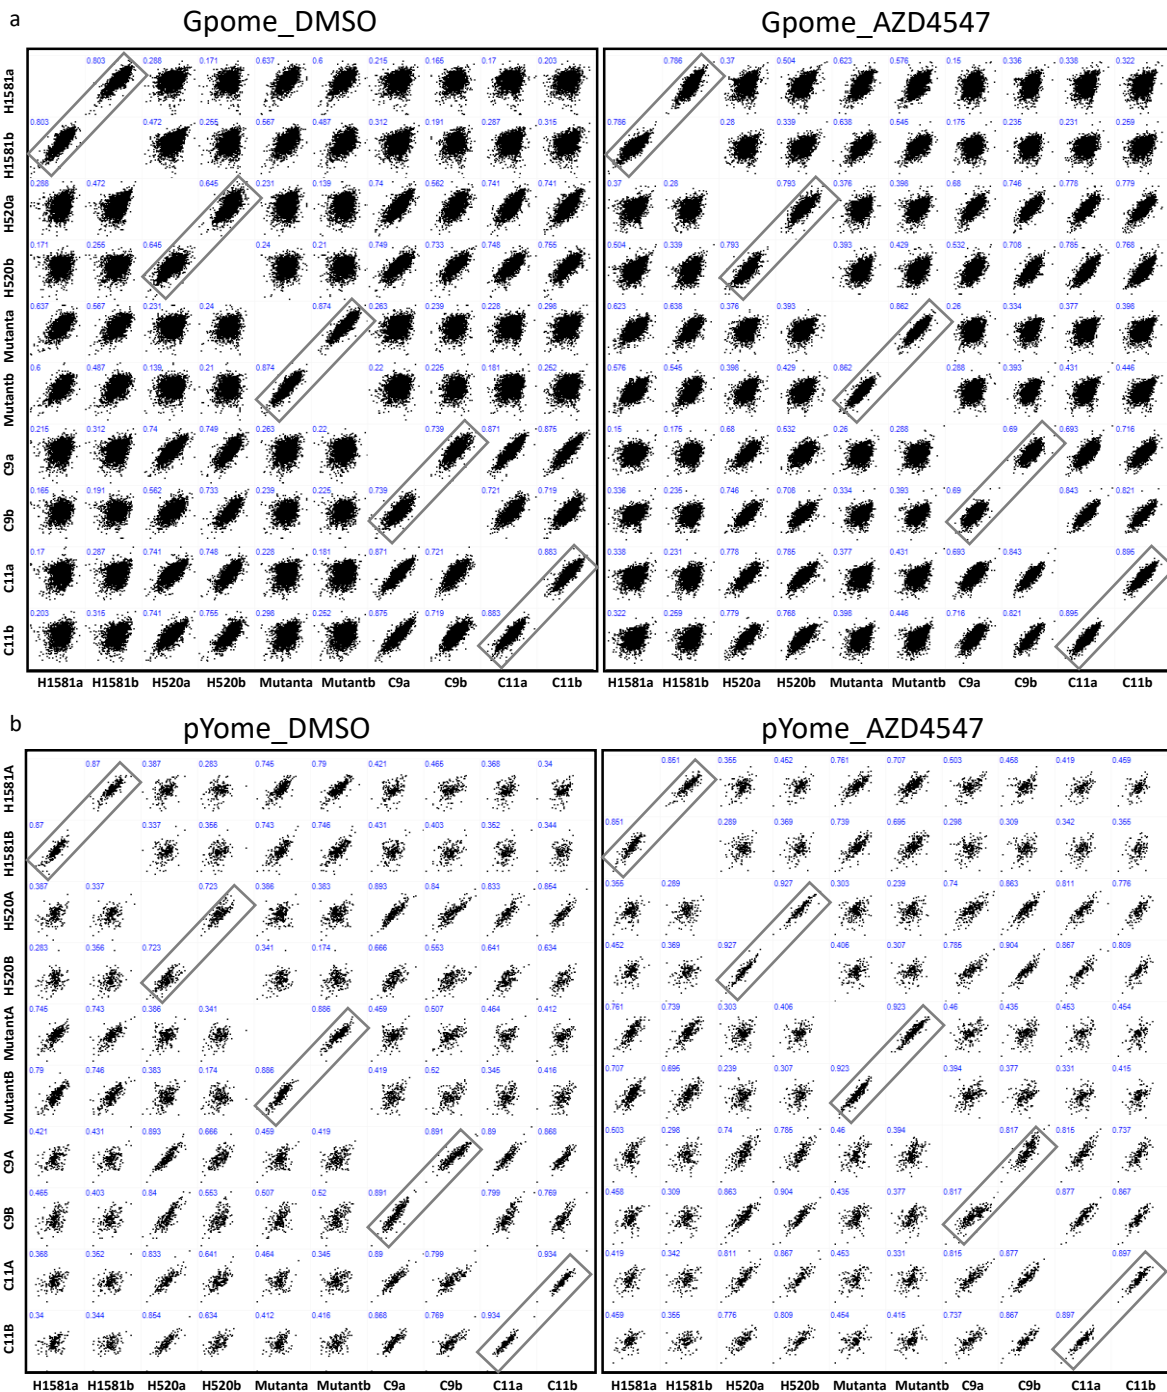

**Supplementary Figure 5:** Scatter plots showing similarity between biological replicates for each sample used in the phospho LC-MS/MS analysis through Pearson correlation; **a** and **b** indicate first and second biological replicates, respectively, in the GPome (A) and pYome (B) group.

## Supplementary Figure 6

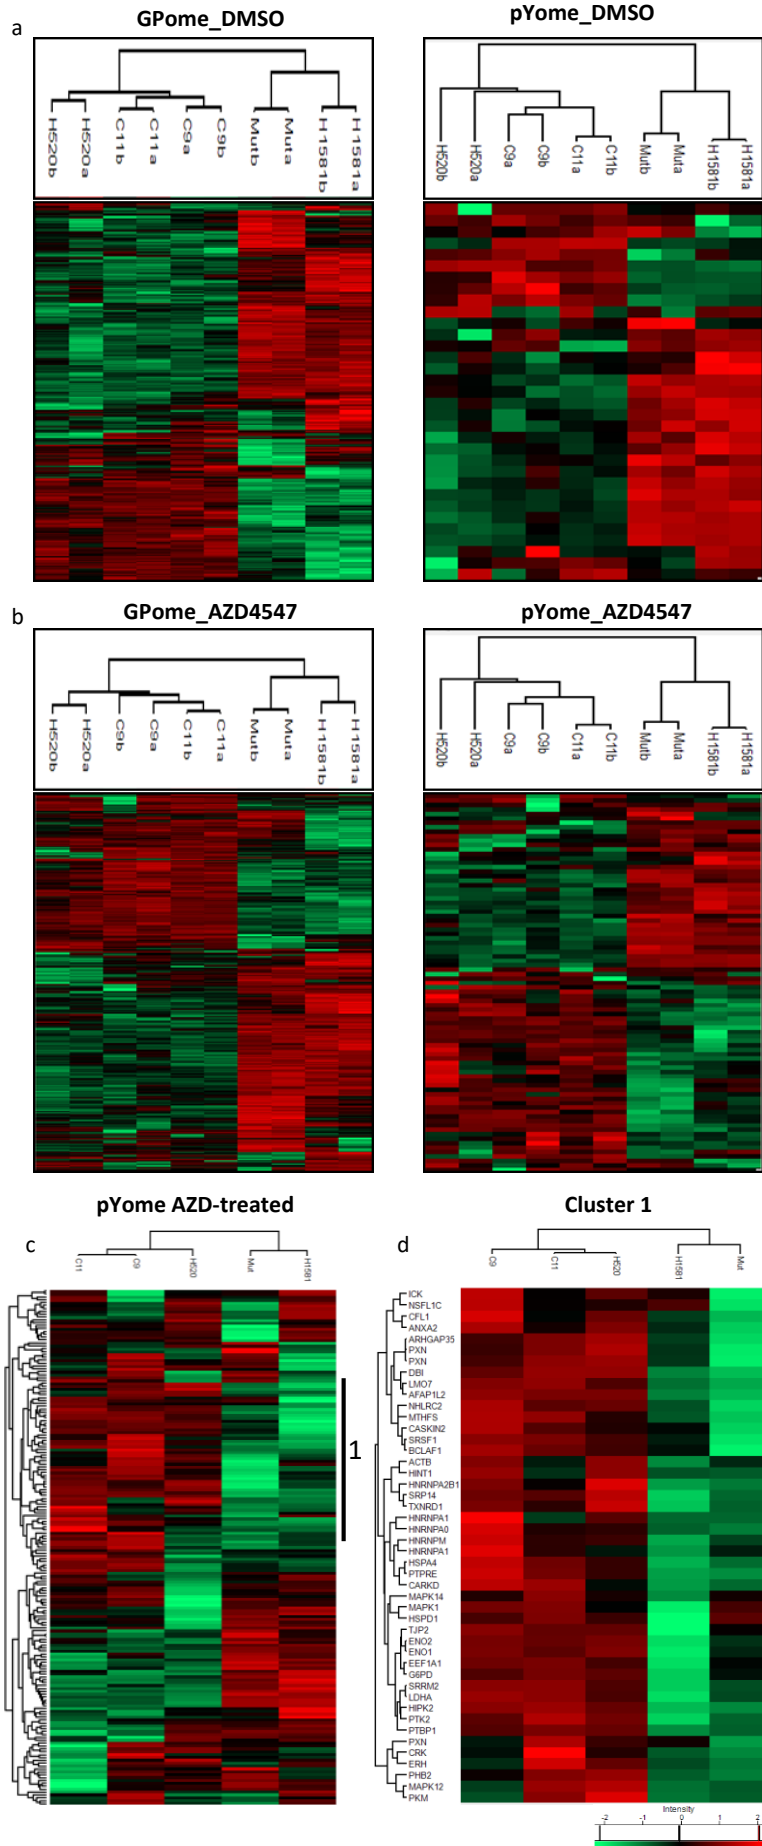

**Supplementary Figure 6:** Heatmaps showing significantly up- and down-regulated phosphosites among each of the biological replicates of the five cell lines. **(A, B)** Biological replicates among DMSO-treated (A) and AZD4547-treated (B) cells. **(C, D)** Heatmaps showing significantly up- and down-regulated phosphorylation in: the native-resistant cell line NCI-H520; the induced-resistant H1581 with resistance induced by AKT mutational overexpression; two induced-resistant single clones H1581-C9R and H1581-C11R; and the sensitive parental control H1581 cell after treatment with the FGFR1-inhibitor AZD4547 and pYome enrichment (C) and expansion of the indicated cluster 1 (D).

# Supplementary Figure 7

## a GPome

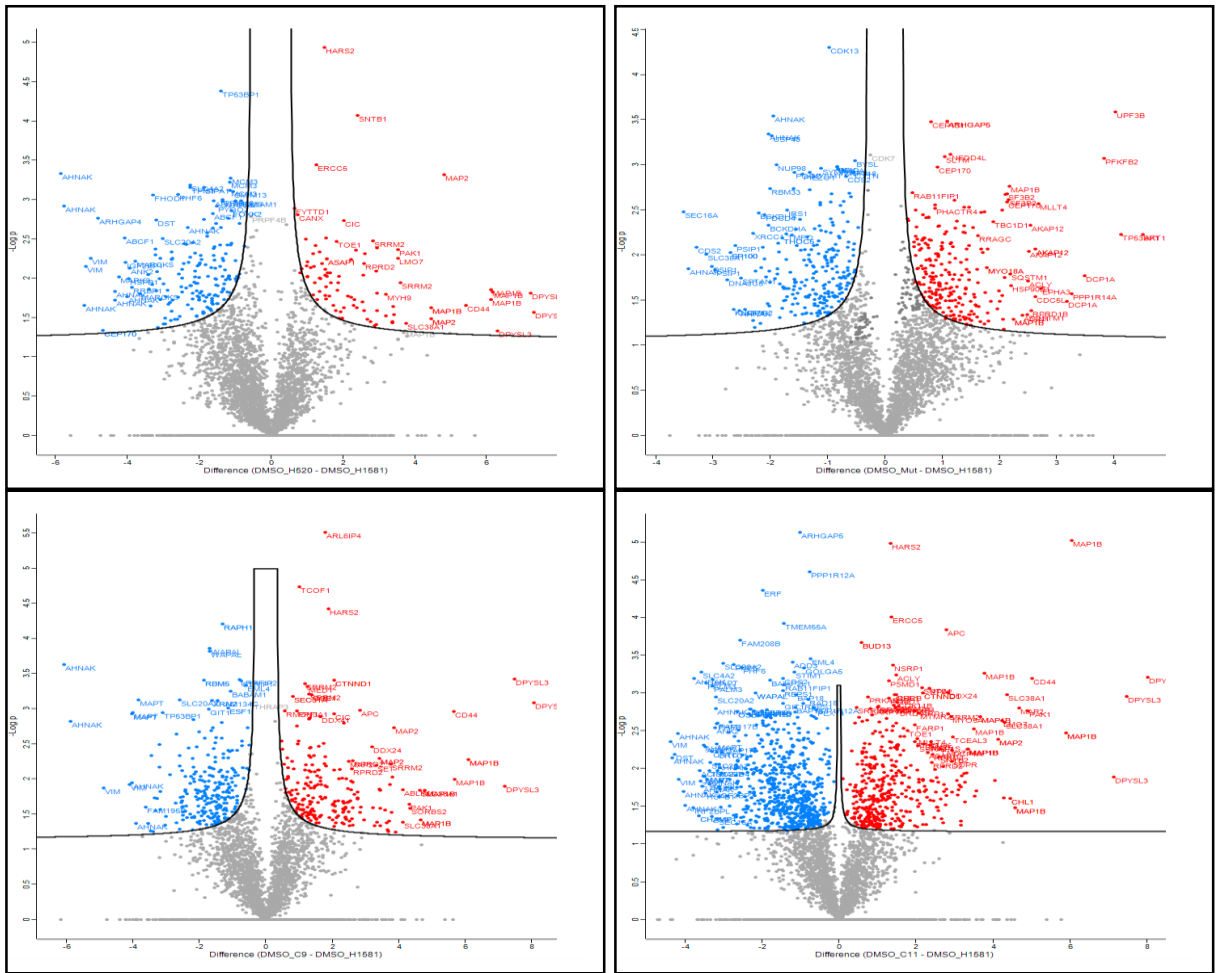

## b pYome

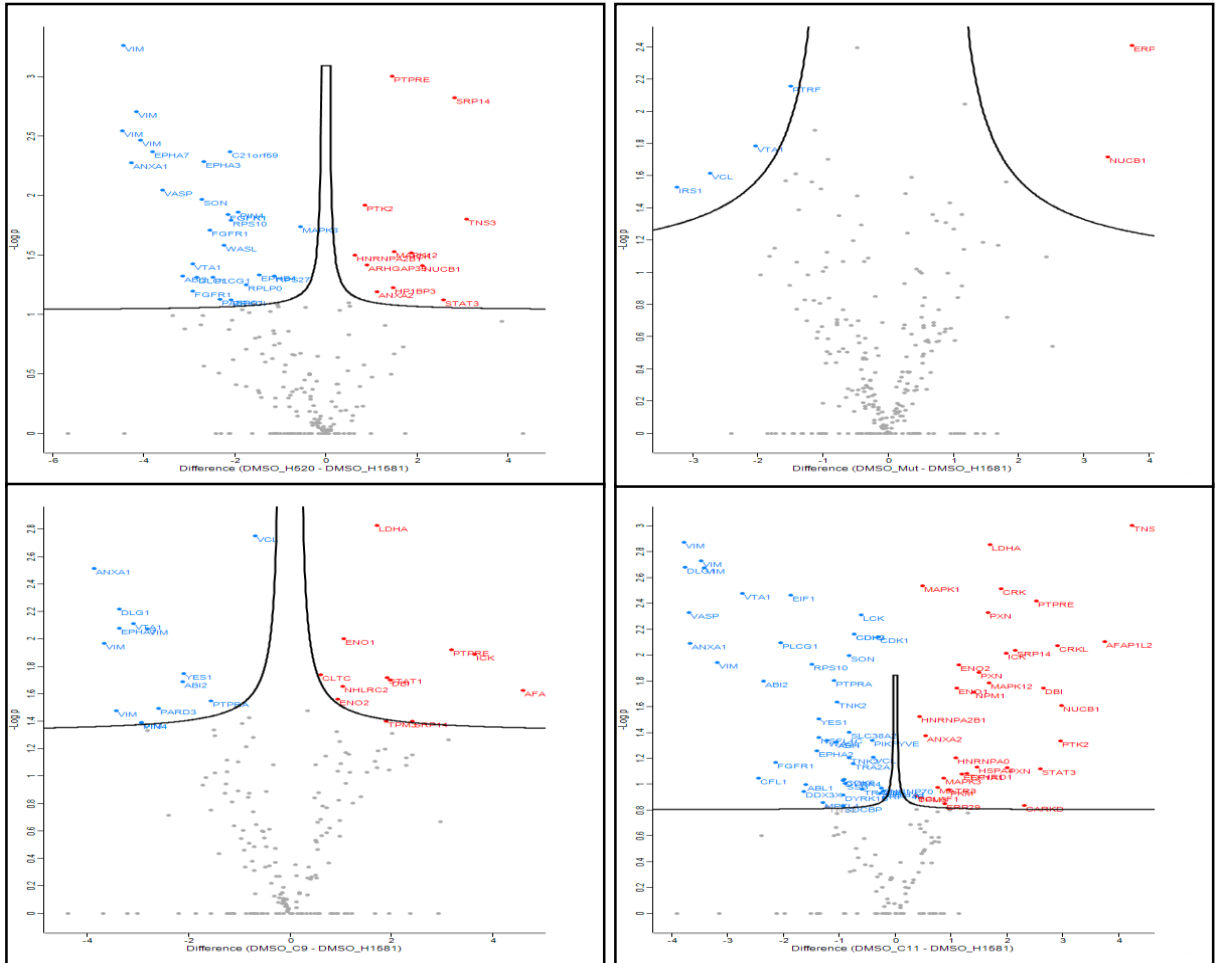

# Supplementary Figure 7

c GPome

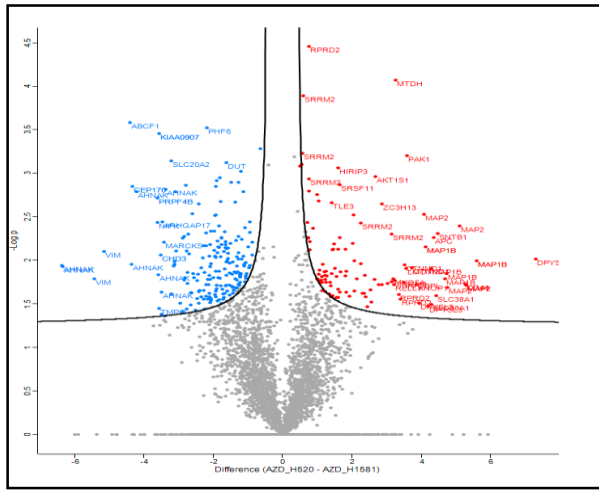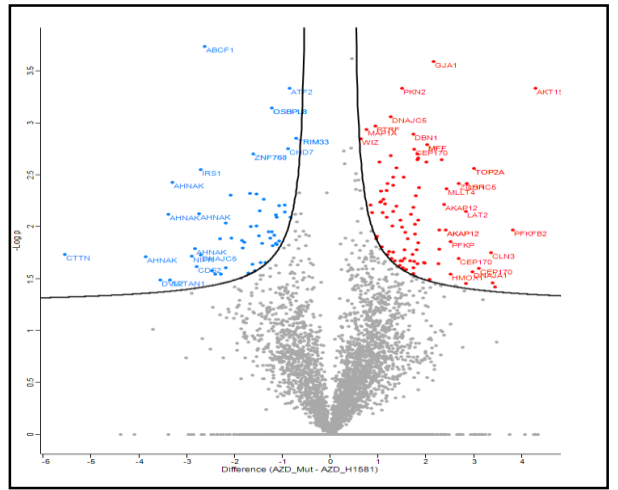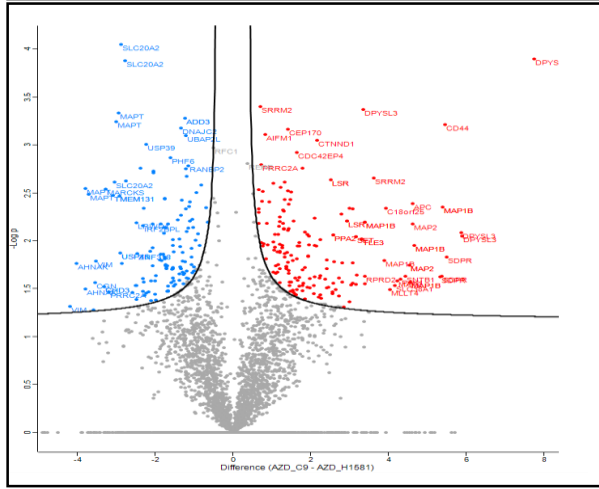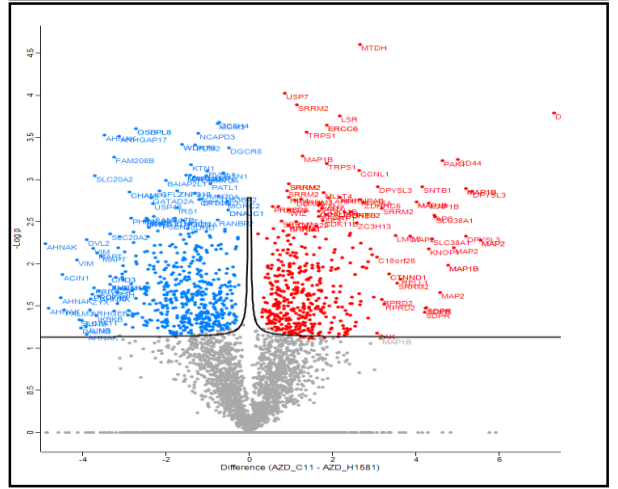

d pYome

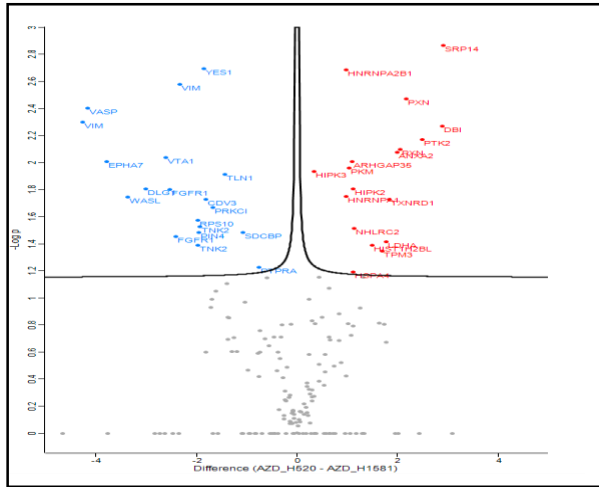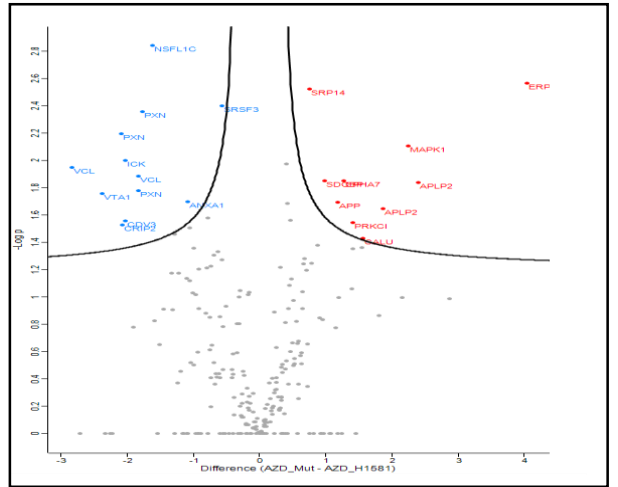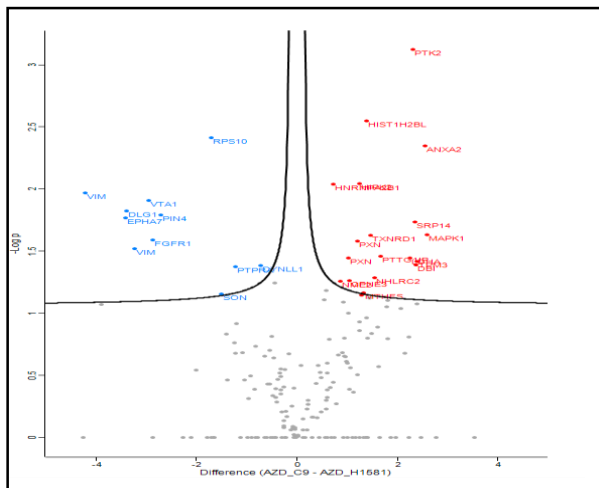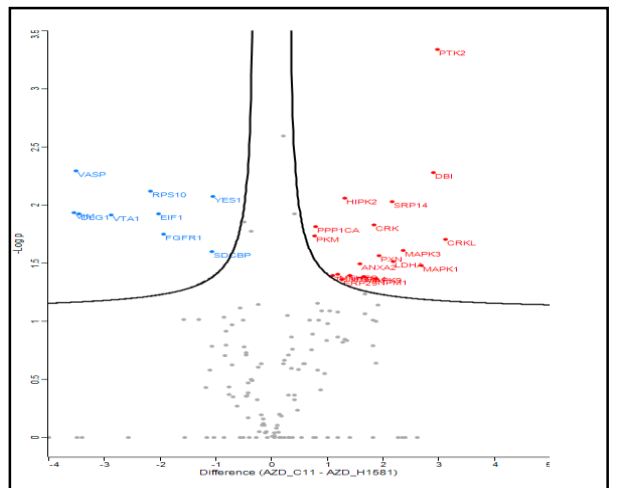

**Supplementary Figure 7:** Volcano plots show significantly up-/down-regulated phosphosites within the control and FGFR1-resistant cell lines under conditions of DMSO and FGFR1 inhibition.

# Supplementary Figure 8

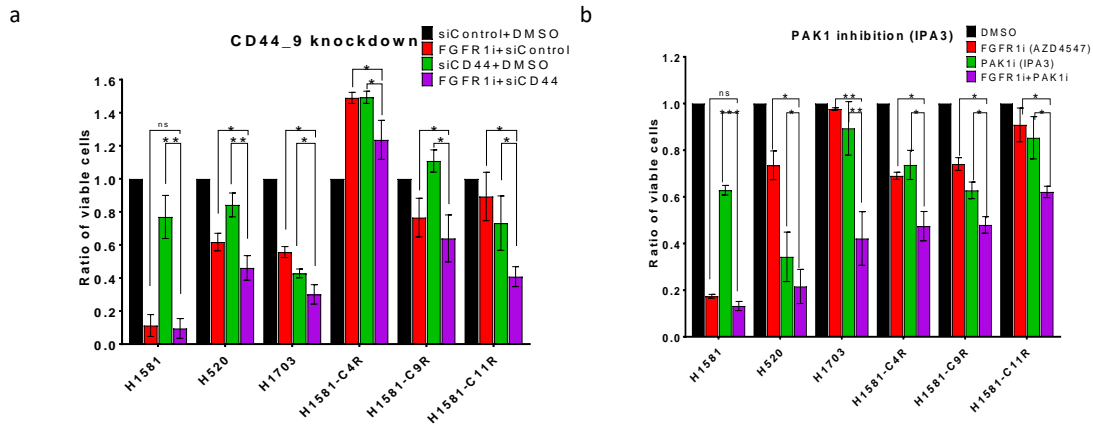

**c**

| Inhibitor (μM) | 1    | 2    | 3     | 4     | 5     | 6     | 7     | 8     | 9     |
|----------------|------|------|-------|-------|-------|-------|-------|-------|-------|
| FGFR1          | DMSO | 0.03 | 0.50  | 1.00  | 1.20  | 1.30  | 1.40  | 1.50  | 1.70  |
| FRAX579        | DMSO | 0.50 | 0.75  | 1.00  | 1.20  | 1.25  | 1.30  | 1.40  | 1.50  |
| IPA3           | DMSO | 2.50 | 10.00 | 15.00 | 20.00 | 25.00 | 30.00 | 35.00 | 40.00 |

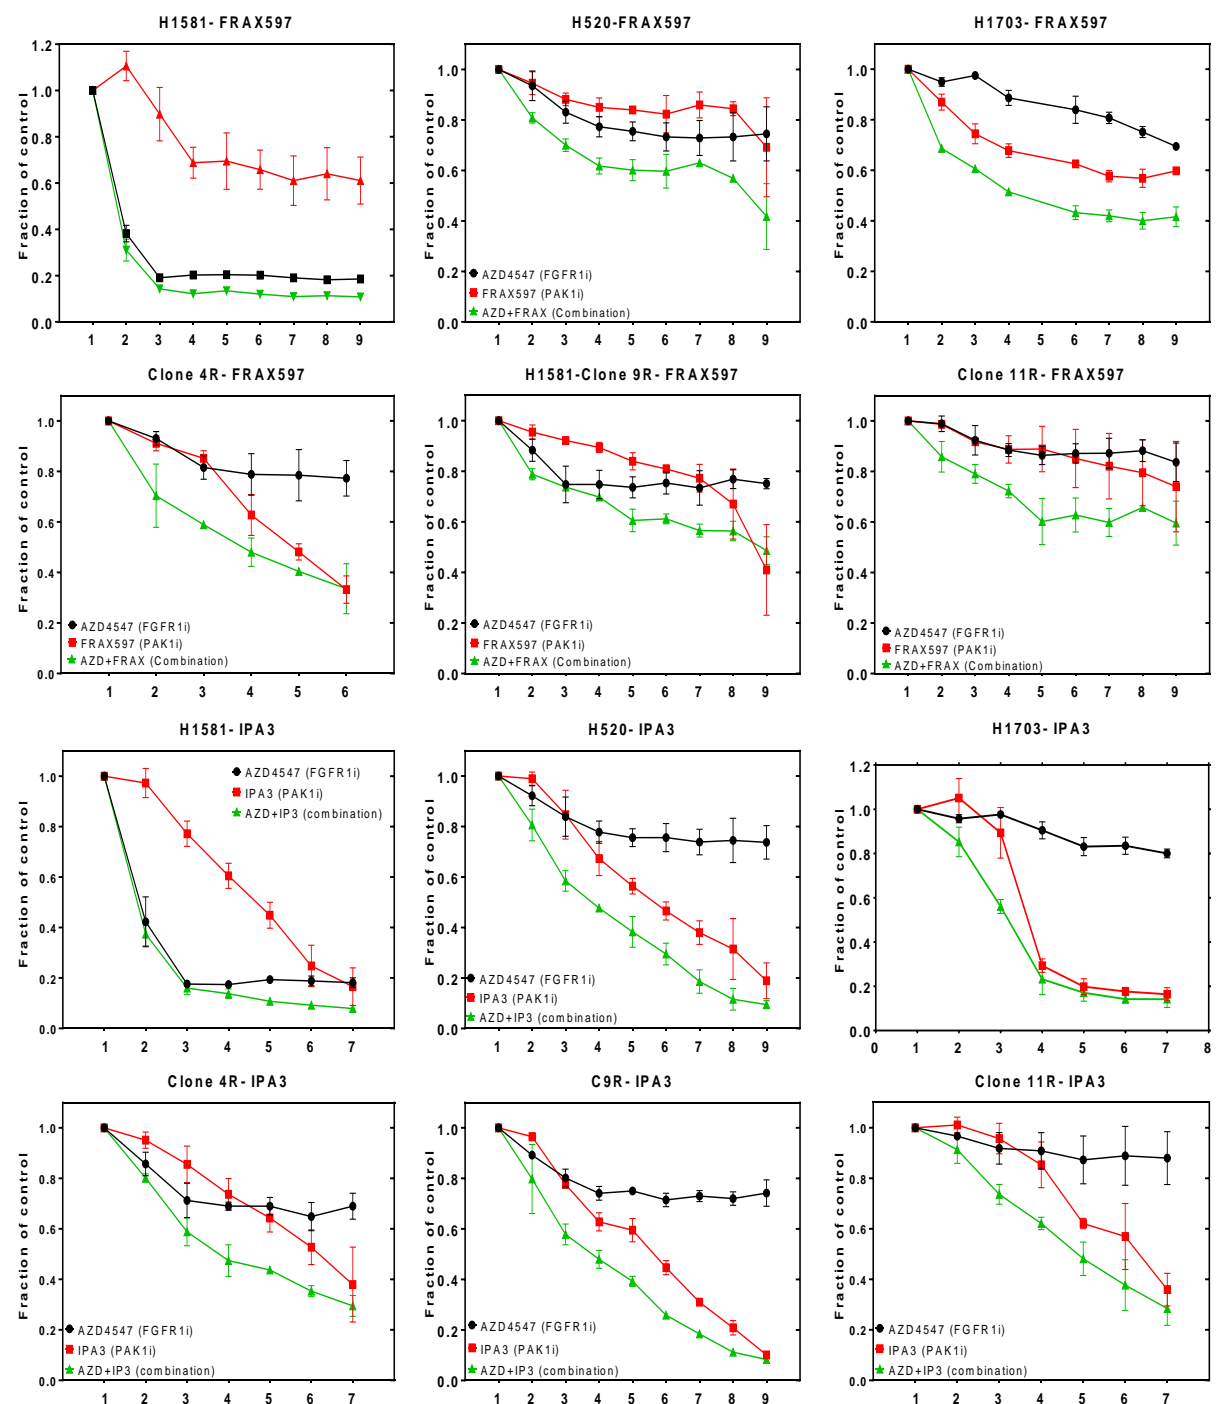



**Supplementary Figure 8: (A, B)** MTS viability assays show the effect of combining (A) CD44 siRNA knockdown (SI03062661) or (B) PAK1 inhibition (IPA3) with FGFR1 inhibition (AZD4547) in sensitive and resistant cell lines. **(C)** Detailed MTS assay curves of PAK1 inhibition (FRAX597 and IPA) combined with FGFR1 inhibition in control cell lines and cell lines resistant to FGFR1 inhibition. Statistical analysis was performed with the chi-squared test: ns ( $p > 0.05$ ), \* ( $p < 0.05$ ), \*\* ( $p \leq 0.01$ ) and \*\*\* ( $p \leq 0.001$ ). Mean values are plotted; error bars represent standard deviation.

## Supplementary Figure 9

Figure 1A  
pFGFR1 Y653/654 (92,145 kDa)

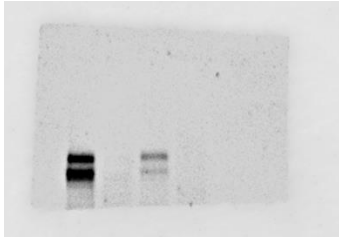

pPRAS40 T246

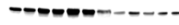

pFOXO1 (78 kDa)

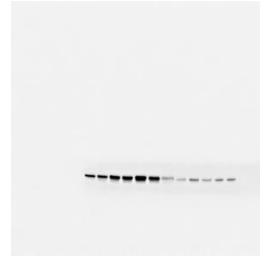

FGFR1 (92,145 kDa)

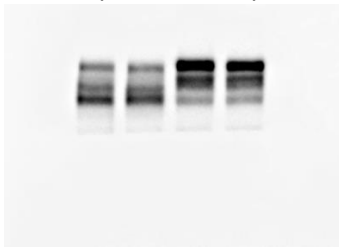

pAKT (60 kDa) (Ser473)

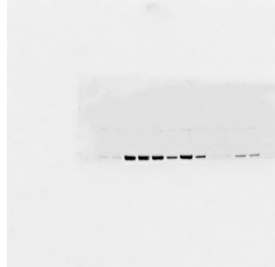

pERK (42, 44 kDa)

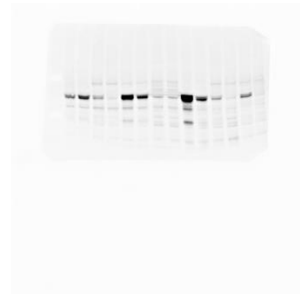

PARK7 (24 kDa)

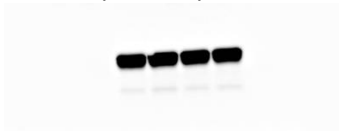

pAKT (60 KDA) Ser473

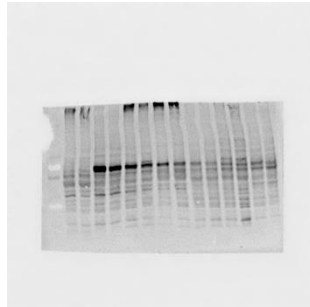

AKT (60 kDa)

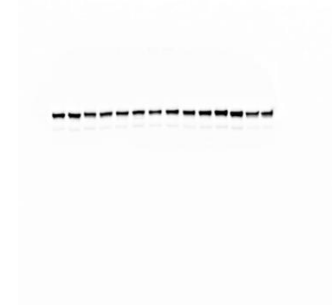

Figure 2A, S2A  
pFGFR1 (92,145 kDa)  
Y653/654

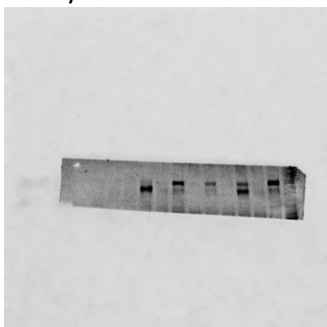

ERK (42, 44 kDa)

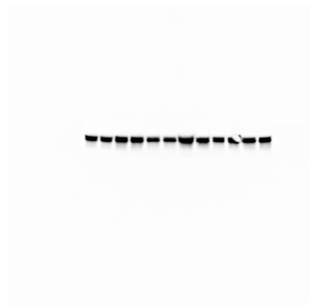

PARK7 (24 kDa)

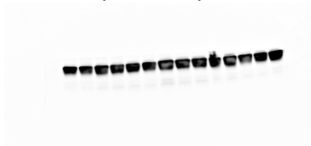

FGFR1 (92,145 kDa)

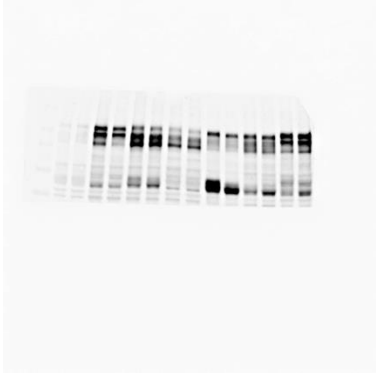

MET (140, 170 kDa)

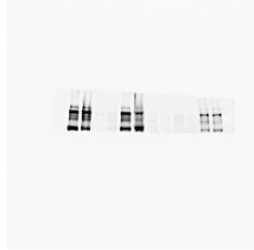

PARK7 (24 kDa)

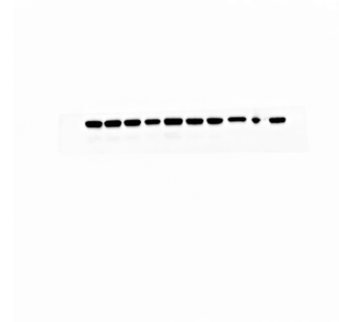

PARK7 (24 kDa)

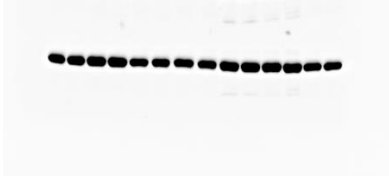

Figure 2C  
FGFR1 (92,145 kDa)

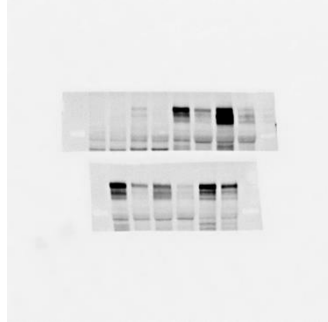

Figure3E  
pAKT (60 kDa) (60 KDA)-  
T308

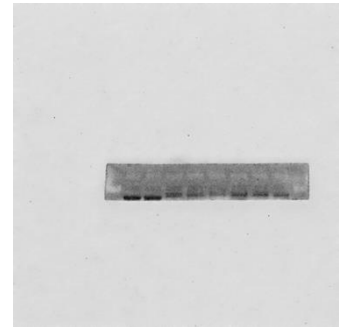

pMEK (45 kDa)

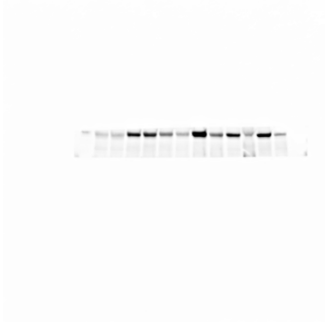

PARK7 (24 kDa)

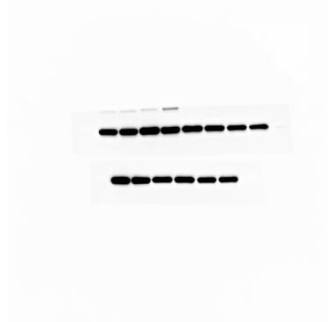

MET (140, 170 kDa)

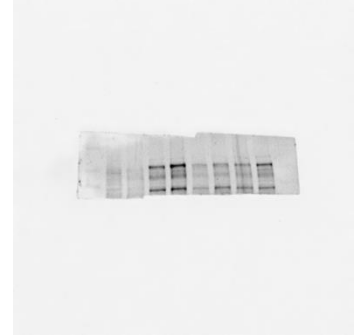

MEK (45 kDa)

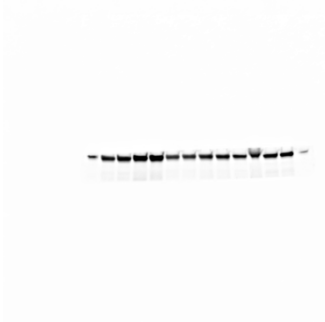

Figure3A, S2E  
pAKT (60 kDa) (60 KDA)-  
Ser

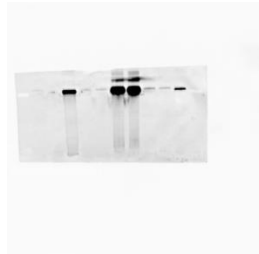

pMET-Y1234/1235

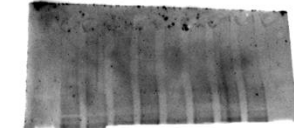

pMET (140, 170 kDa)

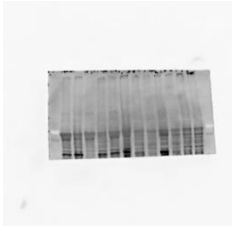

MEK (45 kDa)

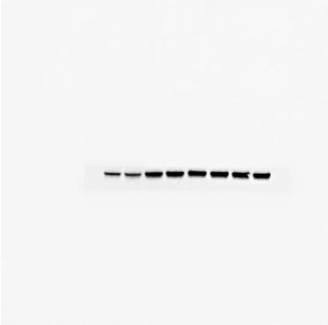

ERK (42, 44 kDa)

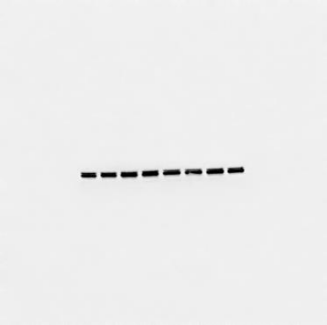

pAKT (60 kDa) SerS473

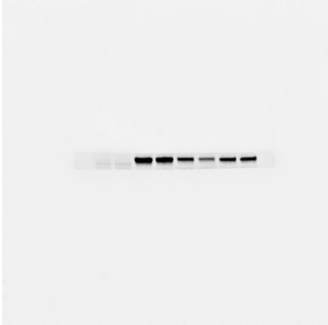

pMEK (45 kDa)

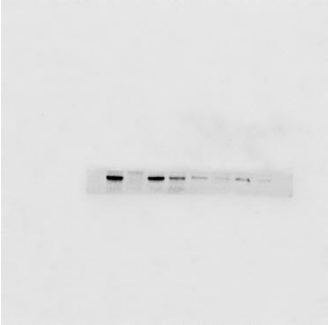

FGFR1 (92,145 kDa)

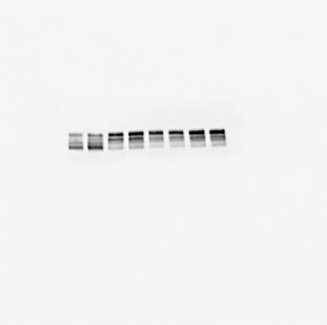

Figure 5B  
CD44 (80 kDa)

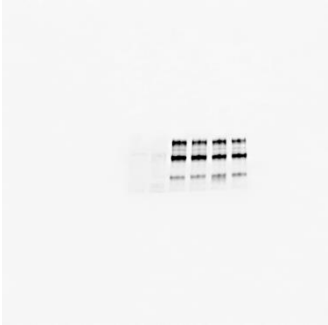

PARK7 (24 kDa)

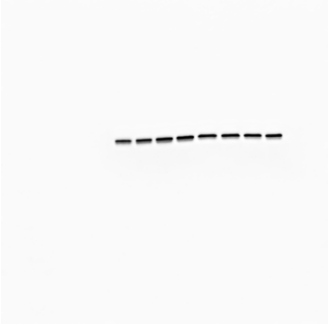

pFGFR1 (92,145 kDa)  
Y653/Y654

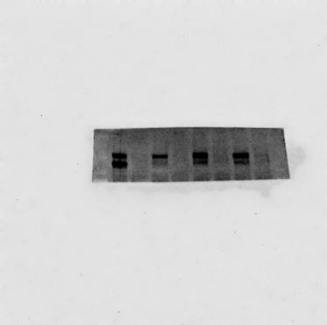

PARK7 (24 kDa)

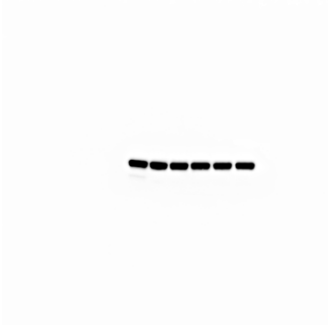

pPRAS40 T246

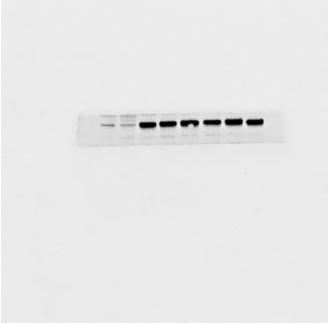

pERK (42, 44 kDa)  
T202/Y204

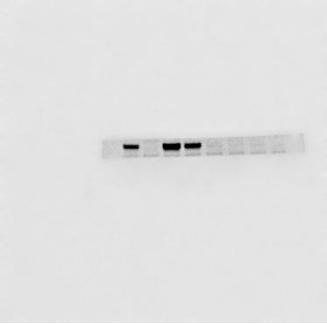

pAKT (60 kDa) Ser473

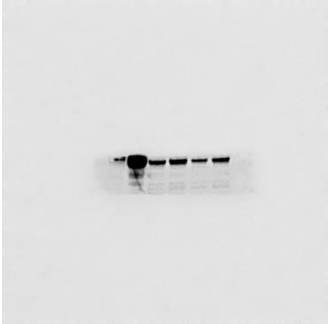

pCD44 (80 kDa) S706

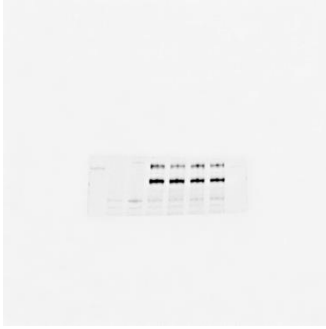

pCD44 (80 kDa) S706  
H520

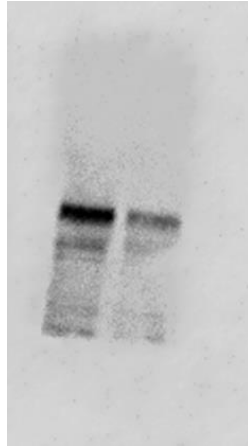

PAK1 (68 kDa) H1581-C4R

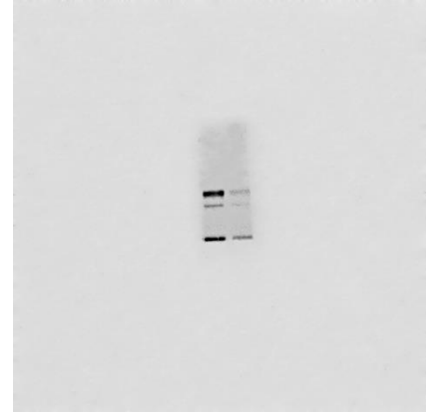

AKT (60 kDa)

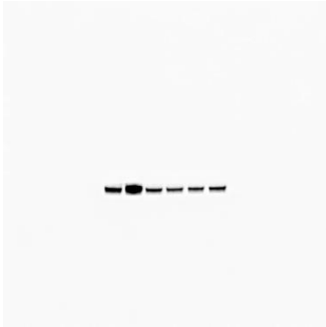

PAK1 (68 kDa) H520

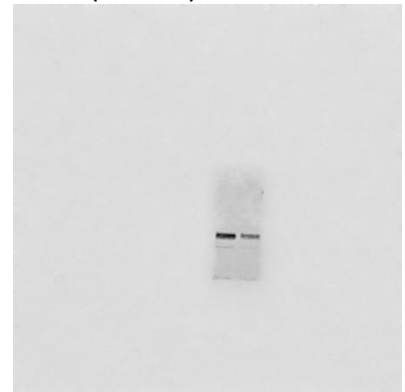

pCD44 (80 kDa) S706  
H1581-C9R

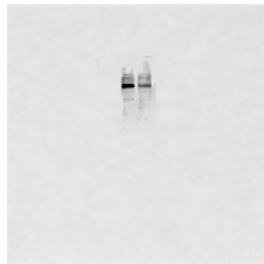

pPRAS40 T246 (40 kDa)

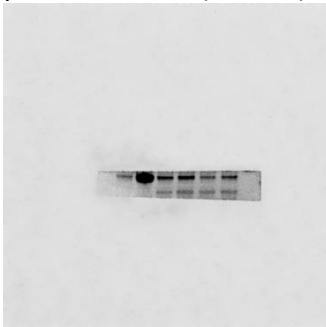

pCD44 (80 kDa) S706  
H1581-C11R

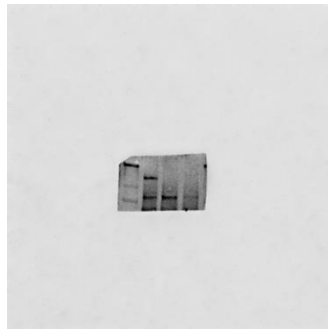

PAK1 (68 kDa) H1581-C9R

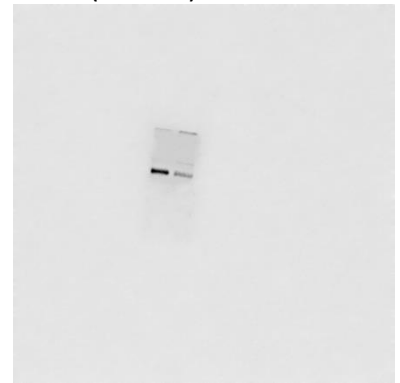

Figure 5C  
pCD44 (80 kDa) S706  
H1581-C4R

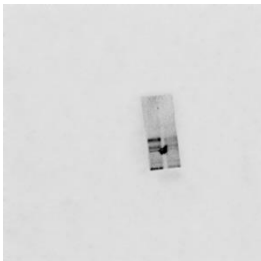

PAK1 (68 kDa) H1581-C11R

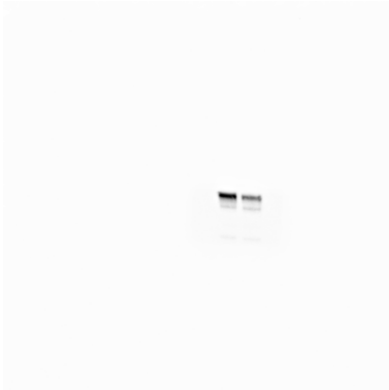

pPAK1 (68 kDa) S144 H1581-C11R

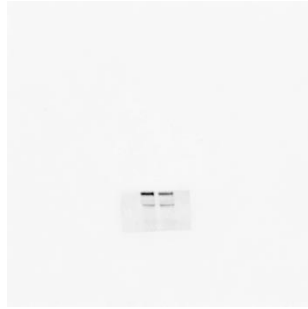

CD44 (80 kDa) H1581-C11R

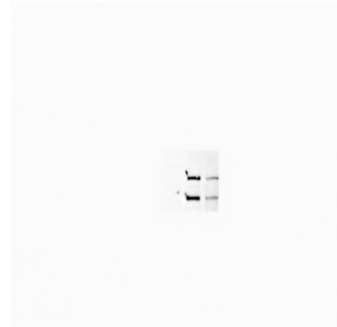

pPAK1 (68 kDa) S144 H1581-C4R

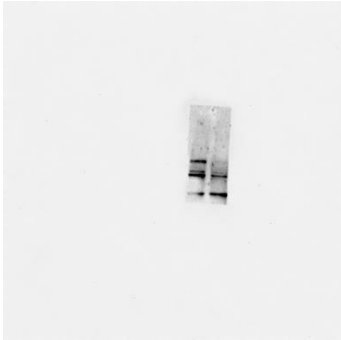

PARK7 (24 kDa) H1581-C4R

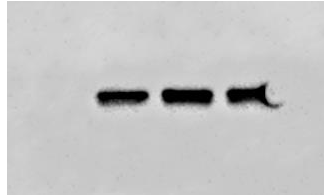

CD44 (80 kDa) H1581-C4R

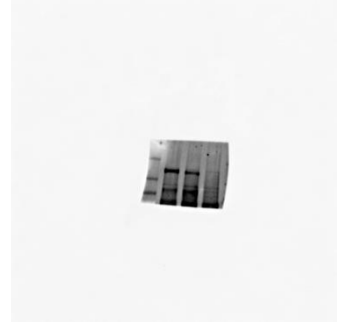

PARK7 (24 kDa) H1581-C9R

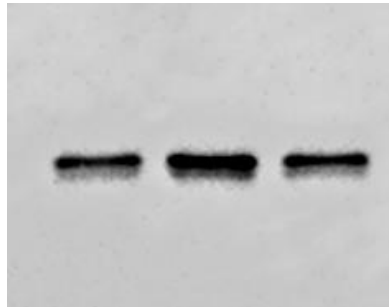

CD44 (80 kDa) H1581-C9R

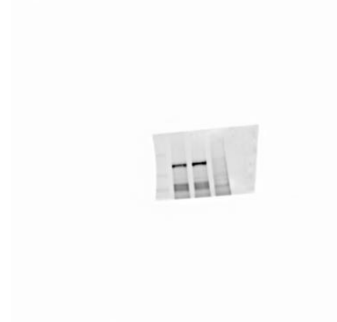

pPAK1 (68 kDa) S144 H1581-C9R

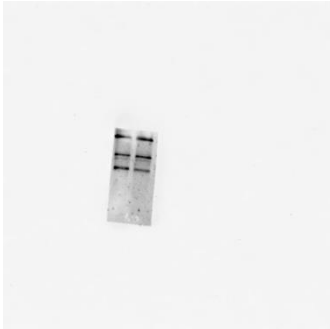

PARK7 (24 kDa) H1581-C11R

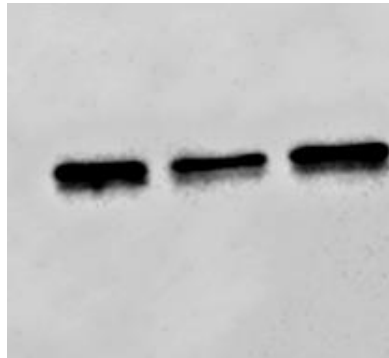

CD44 (80 kDa) H520

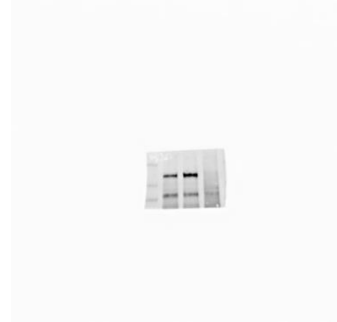

pPAK1 (68 kDa) S144 H520

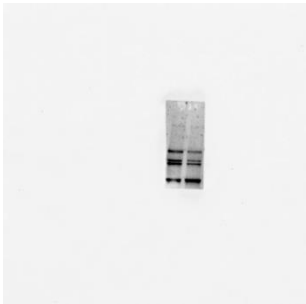

PARK7 (24 kDa) H520

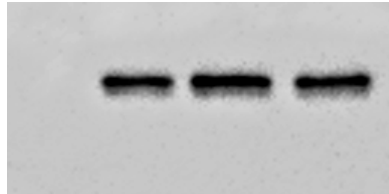

pAKT (60 kDa) Ser473  
H1581-C4R

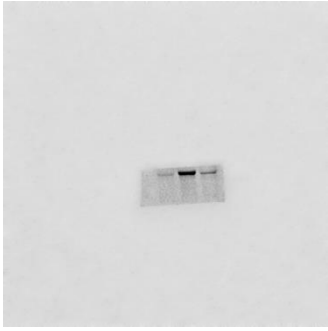

AKT (60 kDa) H1581-C11R

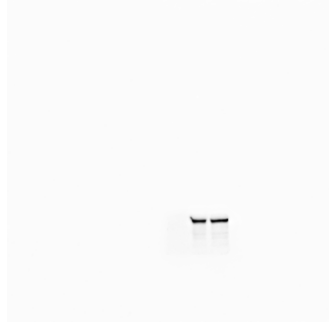

Figure 5D  
AKT (60 kDa)

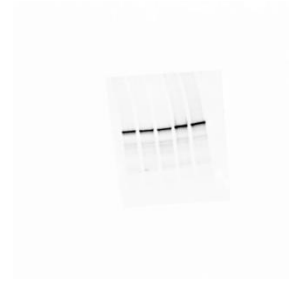

pAKT (60 kDa) Ser473  
H1581-C9R

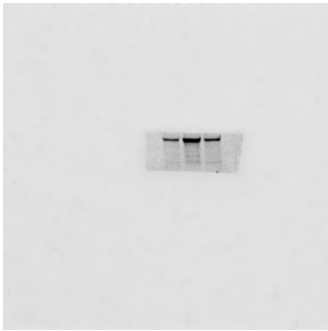

AKT (60 kDa) H520

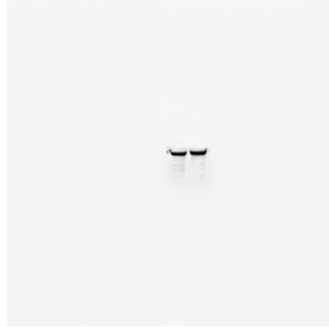

PAK1 (68 kDa)

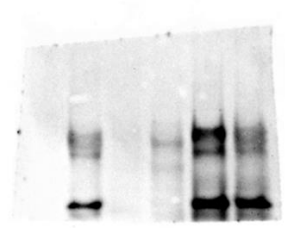

pAKT (60 kDa) Ser473  
H1581-C11R

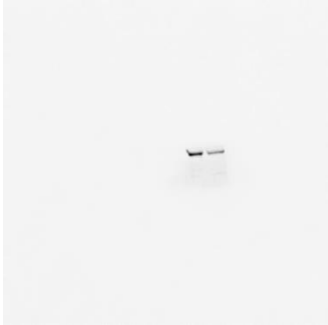

AKT (60 kDa) H1581-C4R

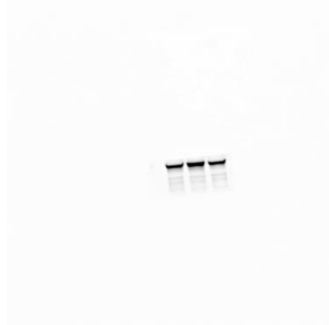

pPAK1 (68 kDa) S144

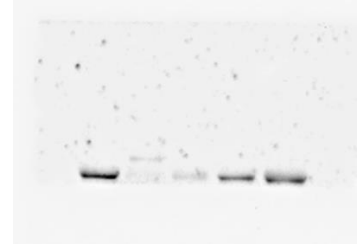

pAKT (60 kDa) (60 KDA)  
Ser473 H520

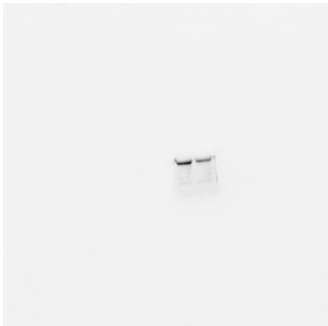

AKT (60 kDa) (60 KDA)  
H1581-C9R

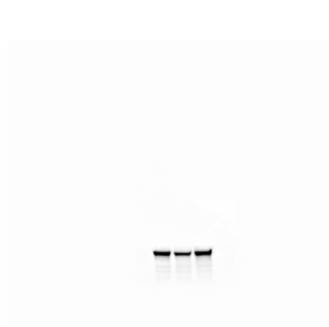

pAKT (60 kDa) (60 KDA)  
Ser473

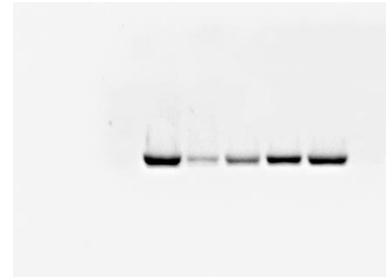

PARK7 (24 kDa)

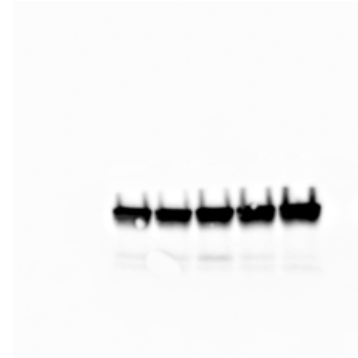

pPRAS40 T246 (40 kDa)

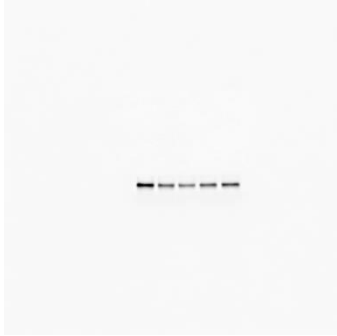

pAKT (60 kDa) Ser473

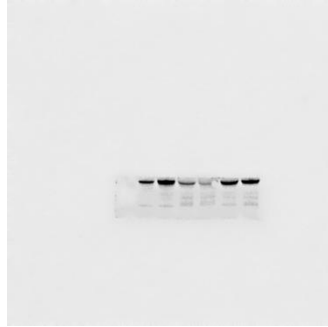

pPAK1 (68 kDa) S144

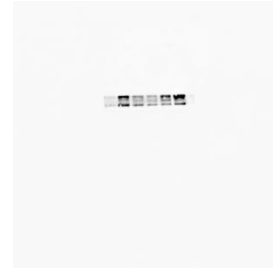

pCD44 (80 kDa) (80 kDa)  
S706

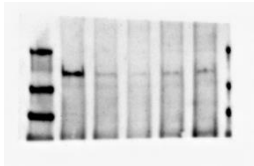

AKT (60 kDa)

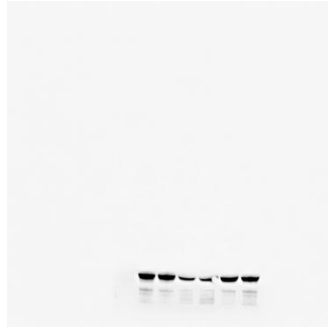

FIGURE 5H

PAK1 (68 kDa) H1581-C9R

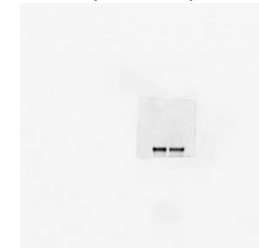

CD44 (80 kDa)

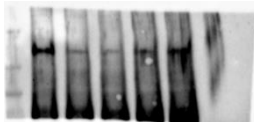

PAK1 (68 kDa) H520

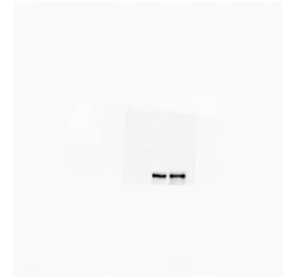

Figure 5E  
pCD44 (80 kDa) S706

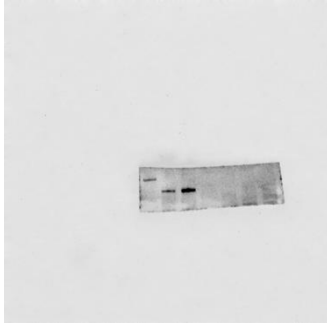

PARK7 (24 kDa)

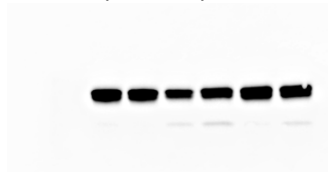

pPRAS40 T246

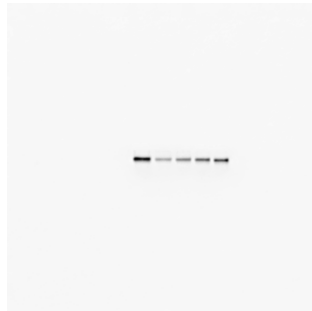

pPAK1 (68 kDa) S144  
H520

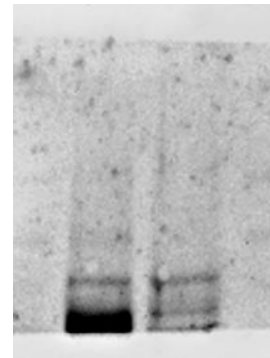

CD44 (80 kDa)

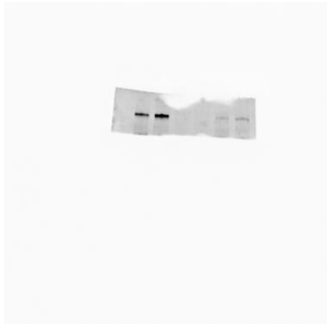

PAK1 (68 kDa)

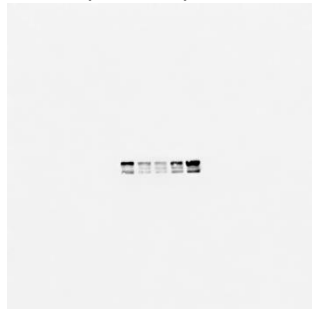



pPAK1 (68 kDa) S144  
H1581-C9R

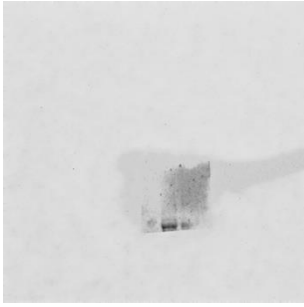

pPRAS40 T246 H520 (40  
kDa)

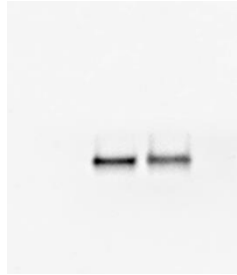

pAKT (60 kDa) Ser473

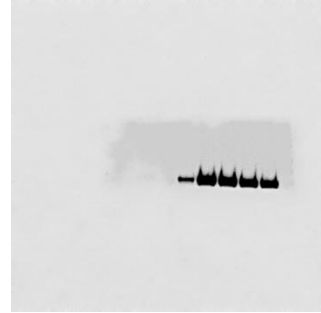

AKT (60 kDa) H520

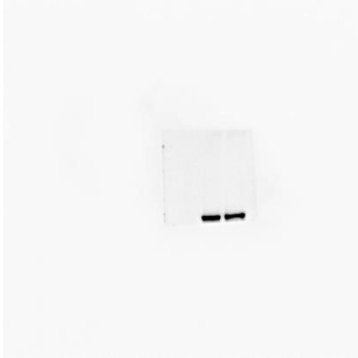

pPRAS40 T246 H1581-  
C9R (40 kDa)

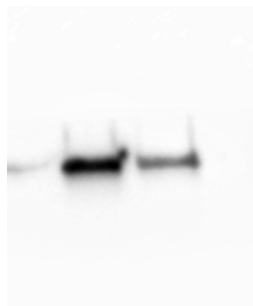

PARK7 (24 kDa)

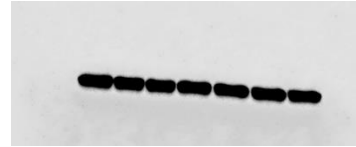

Supplementary Figure 3A  
pAKT (60 kDa) Ser473  
H1581

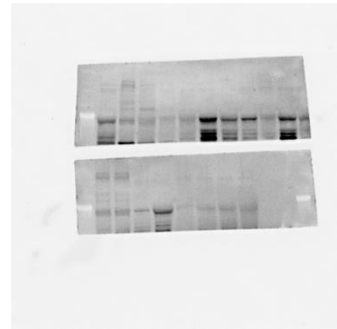

pAKT (60 kDa) Ser473  
H520

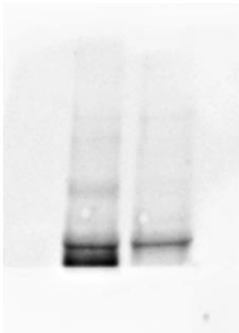

PARK7 (24 kDa) H520

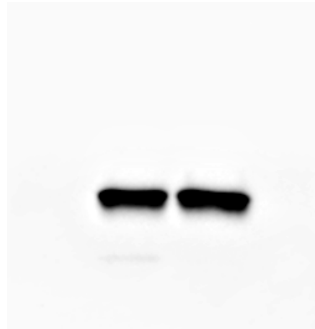

pAKT (60 kDa) Ser473  
DMS114

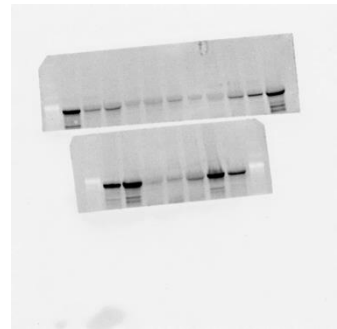

pAKT (60 kDa) (60 KDA)  
S473 H1581-C9R

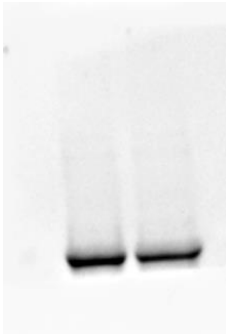

Supplementary Figure2B  
pPRAS40 T246 (40 kDa)

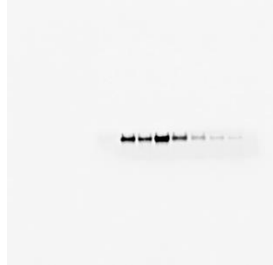

pAKT (60 kDa) Ser473 LK2

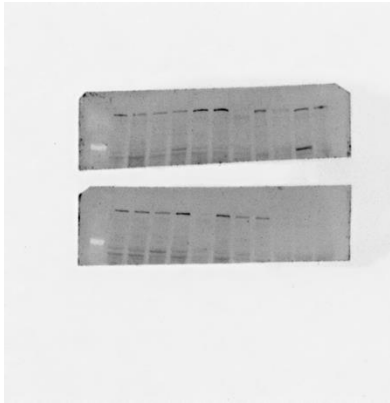

Supplementary Figure 3B  
pPRAS40 T246 (40 kDa)

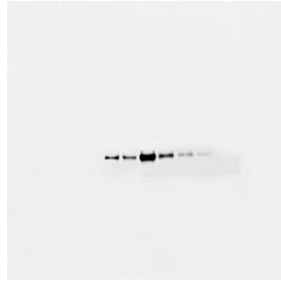

PARK7 (24 kDa) H1581

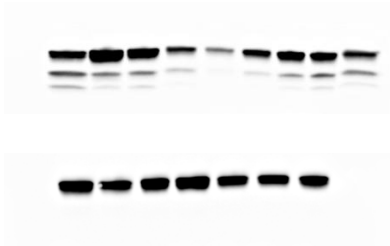

pAKT (60 kDa) Ser473

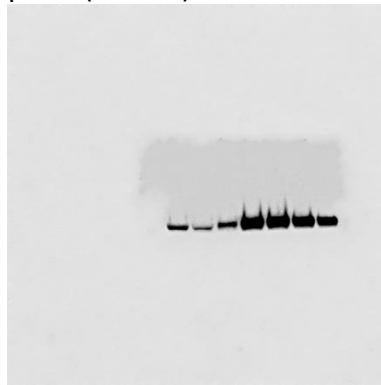

PARK7 (24 kDa) DMS114

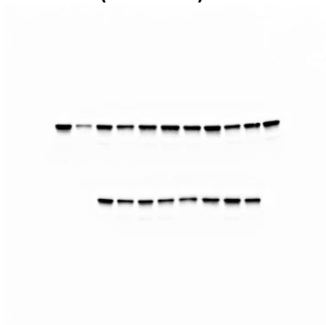

PARK7 (24 kDa)

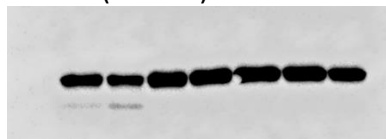

PARK7 (24 kDa) LK2

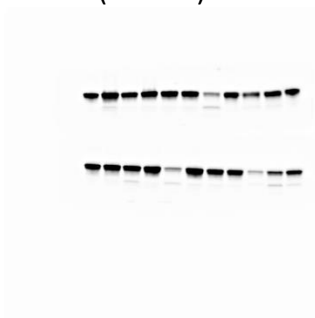

Supplement: 41698_2022_296_MOESM1_ESM.pdf [file 41698_2022_296_MOESM1_ESM.pdf]
